# Supplementary material for: Inhibition of sodium dendrites by solvent structural reorganization for non-flammable high-performance sodium-metal batteries
Source: Royal Society of Chemistry journal article supplement (doi:10.1039/d4ta03054k), 2024-01-01
Supplement: d4ta03054k1.pdf [file d4ta03054k1.pdf]

# Supporting Information

## **Inhibition of sodium dendrite by solvent structural reorganization for non-flammable high-performance sodium-metal batteries**

JiYuan You, Bo Zhang, Tianle Li, Yuqian Li, Wenju Wang\*

*School of Energy and Power Engineering, Nanjing University of Science and Technology, Nanjing  
210094, Jiangsu Province, China*

**Keywords:** Sodium-metal batteries; Sodium dendrite; In-situ optical visualization; High-safety electrolyte, Electrolyte simulation

---

\* Corresponding author.  
E-mail address: [wangwenju@njust.edu.cn](mailto:wangwenju@njust.edu.cn), [wangwenju1982@163.com](mailto:wangwenju1982@163.com) (W.Wang).

# 1. Experimental Section

## 1.1 Raw materials

Na metal stored in kerosene was purchased from Sigma-Aldrich. Triethyl phosphate (TEP), Ethylene carbonate (EC), Diethyl carbonate (DEC), fluoroethylene carbonate (FEC), and hexafluorophosphate ( $\text{NaPF}_6$ ) were purchased from DoDo Chem (China). Other chemical reagents were provided by Sinopharm Chemical Reagent Co. Ltd.

## 1.2 Electrolyte preparation

1 M  $\text{NaPF}_6$  was dissolved in TEP with 5 vol% BSTFA, and 5 vol% FEC. All electrolytes were prepared inside a glovebox with  $\text{O}_2$  and  $\text{H}_2\text{O}$  content  $\leq 0.05$  ppm (Vigor, China).

## 1.3 General Characterization

The morphologies and microstructures of the Na surface were characterized by using a field emission scanning electron microscope (FESEM, Hitachi S4800) and energy dispersive X-ray spectroscopy (EDS). X-ray photoelectron spectroscopy (XPS) was operated by using an ESCALAB\_250Xi X-ray photoelectron spectrometer. To avoid direct contact with air, the samples containing Na metal were all transferred in a homemade device filled with pure Ar.

## 1.4 Electrochemical Measurement

All cells (CR20332 type) were assembled in a glovebox filled with Ar, which  $\text{O}_2$  and  $\text{H}_2\text{O}$  content  $\leq 0.05$  ppm. Cyclic voltammograms (CV) were carried out in an electrochemical workstation (DH7000, DONGHUA, China). CV of Na/NVP full cell was scanned from 2.6 to 3.8 V at a scan rate of  $0.1 \text{ mV s}^{-1}$ . The ionic conductivities of the different electrolytes were measured by a Benchtop conductivity meter (LeiCi, China).

## 1.5 Preparation of Full cells and Symmetric cells

$\text{Na}_3\text{V}_2(\text{PO}_4)_3$  (NVP) was synthesized according to the literature<sup>1</sup>. The NVP cathode electrodes used for full cells were fabricated by maxing the NVP, super P, and PVDF binder at a mass ratio of 7:2:1 on Al foil ( $\sim 1.1 \text{ mg cm}^{-2}$ ). Na anode electrode was made from purchased sodium blocks pressed into 10mm sodium sheets. The Na/NVP full cells were cycled between 2.6-3.8V (1C was defined as  $117.6 \text{ mA g}^{-1}$ ).

## 2. Supplementary data

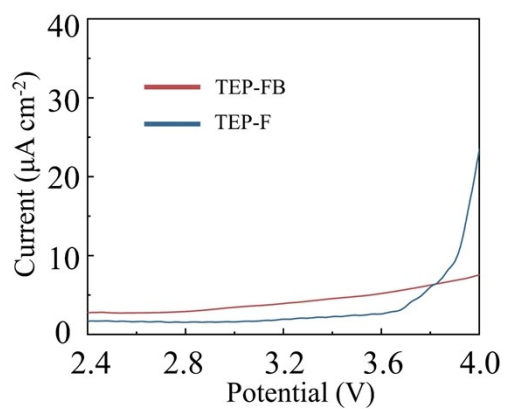

**Fig. S1** Oxidation stabilities for the TEP-FB and TEP-F electrolytes in symmetrical stainless-steel cells at a scan rate of  $0.1 \text{ mV s}^{-1}$ .

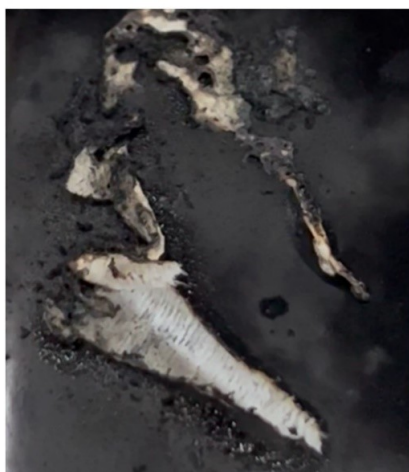

**Fig. S2** Nonwoven fabric morphology after self-extinguishing experiment using TEP-F electrolyte.

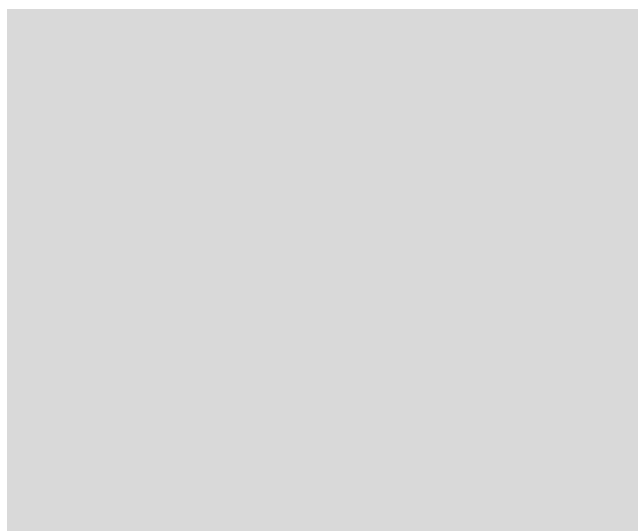

**Fig. S3** The radial distribution function plots of Na-O<sub>PF6</sub><sup>-</sup>, Na-O<sub>FEC</sub>, and Na-O<sub>TEP</sub> pairs in the TEP-F electrolyte.

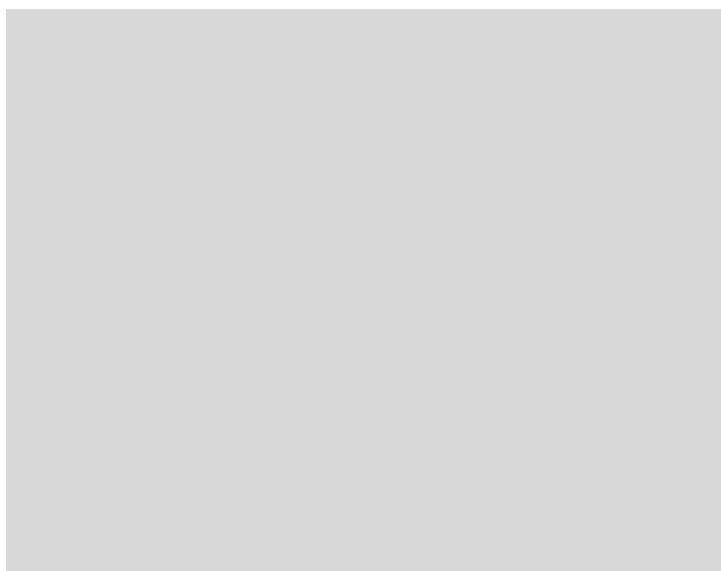

**Fig. S4** The mean square displacement of Na<sup>+</sup> in TEP-FB and TEP-F electrolytes.

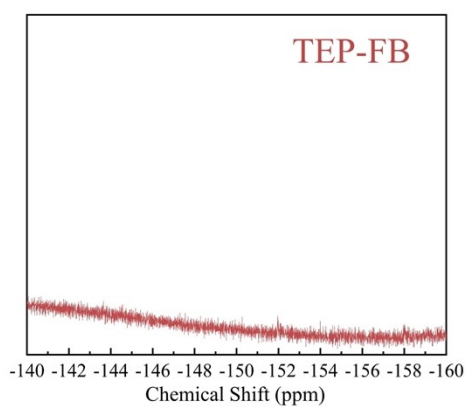

**Fig. S5** <sup>19</sup>F NMR spectra of TEP-FB.

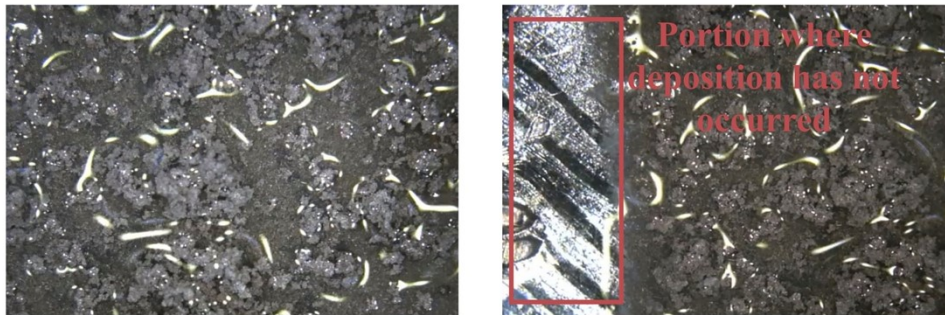

**Fig. S6** Enlarged view of the sodium electrode measurement after completion of the reaction.

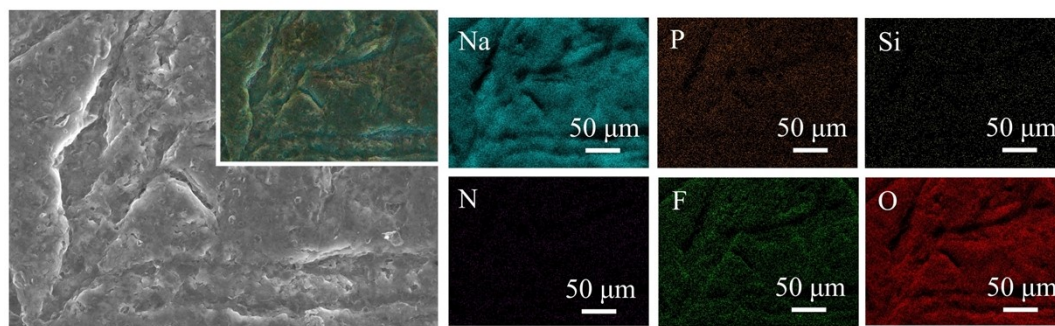

**Fig. S7** EDS mapping images of Na anode with TEP-F electrolyte.

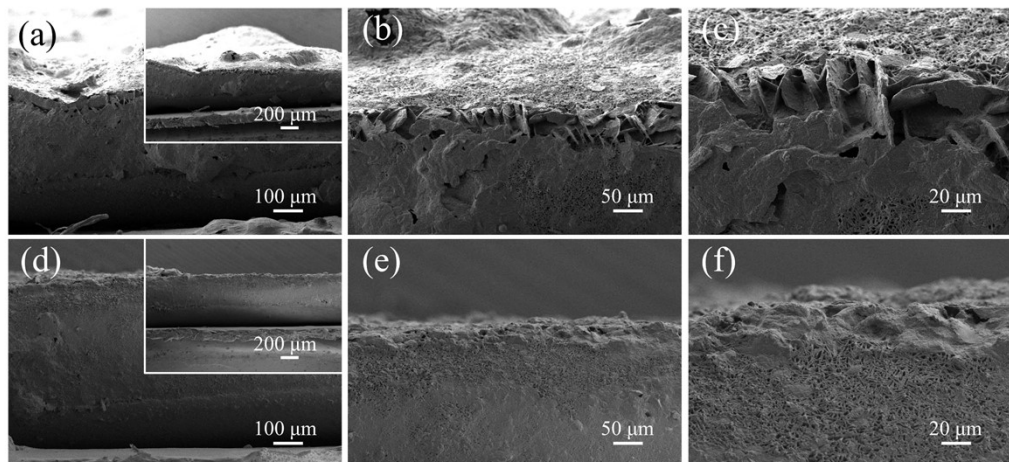

**Fig. S8** SEM image of sodium anode side, (a-b) TEP-F and (d-f) TEP-FB.

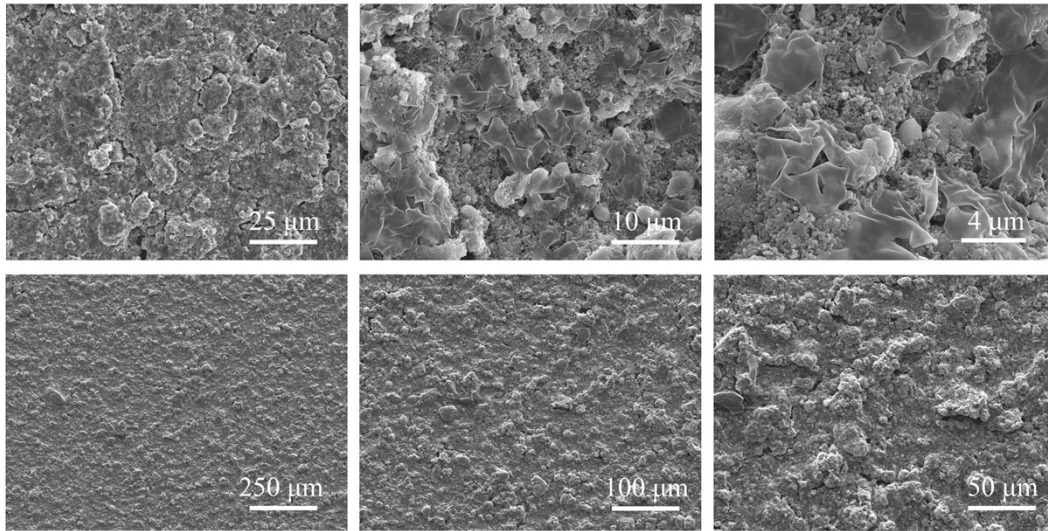

**Fig. S9** SEM images of the CEI layer obtained after a complete cell cycle using sodium metal and NVP in TEP-FB electrolytes.

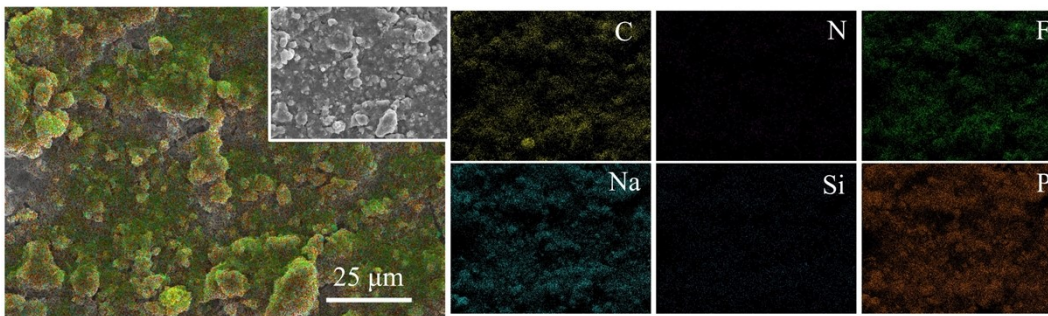

**Fig. S10** EDS mapping of the CEI layer obtained after a full cell cycle with sodium metal and NVP in TEP-FB electrolytes.

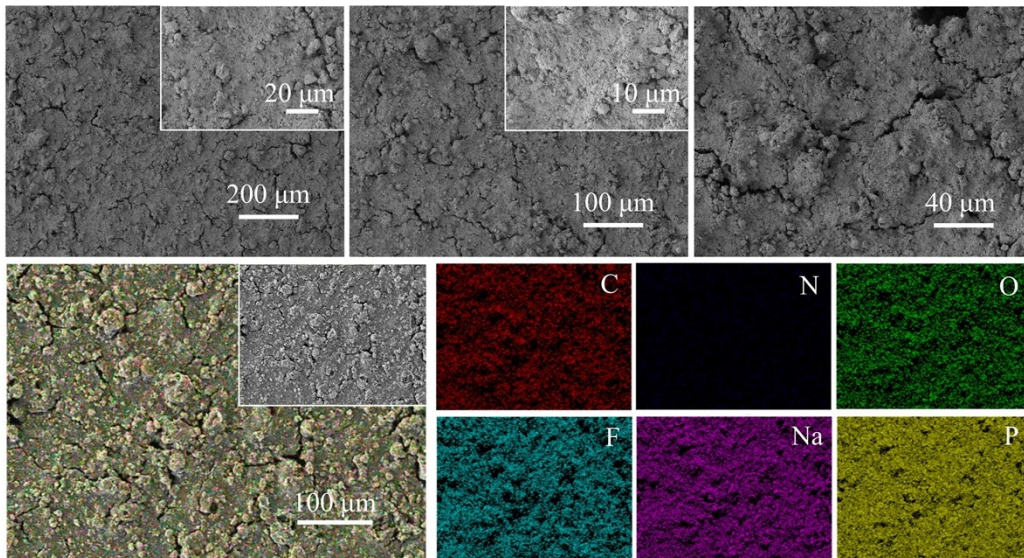

**Fig. S11** SEM images and EDS mapping of the CEI layer obtained after a complete cell cycle using sodium metal and NVP in TEP-F electrolytes.

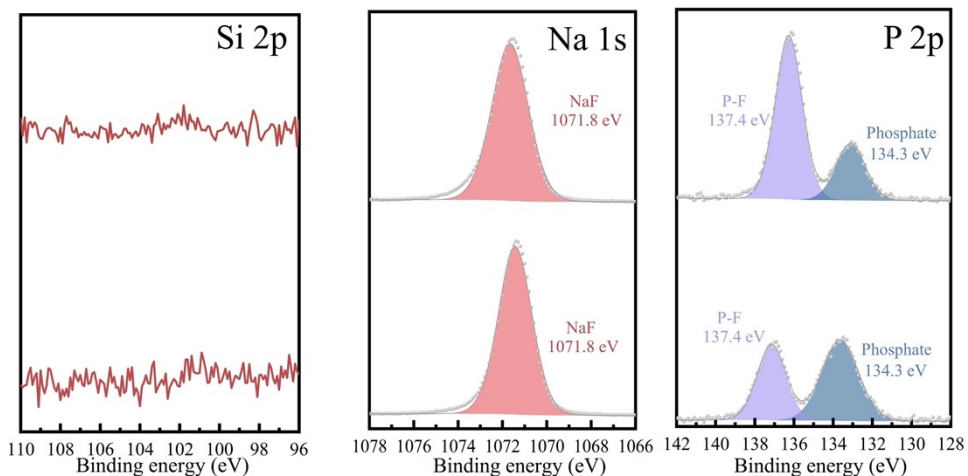

**Fig. S12** (a) Si 2p, (b) Na 1s, and (c) P 2p peaks of TEP-F and TEP-FB electrolytes.

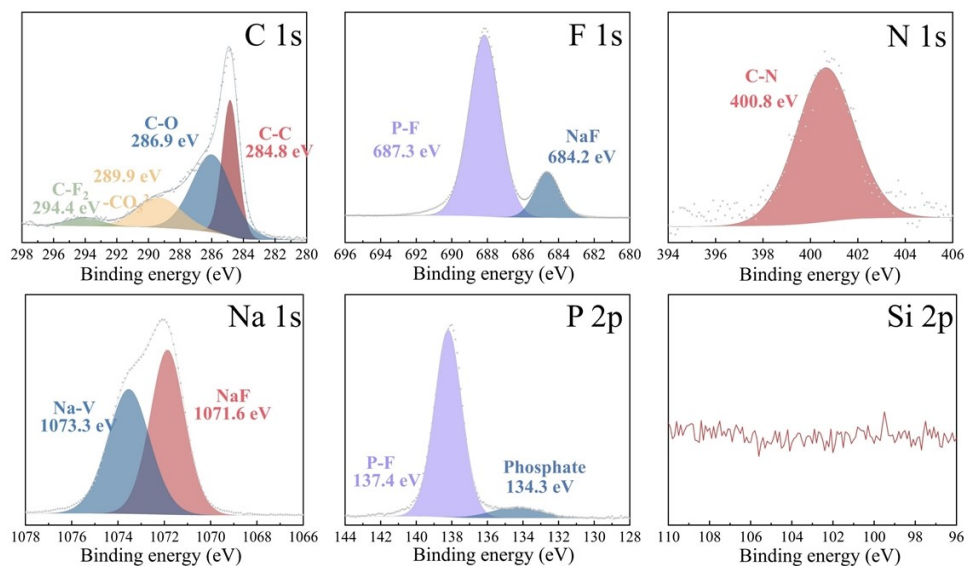

**Fig. S13** XPS characterization of the NVP cathode with TEP-FB electrolyte.

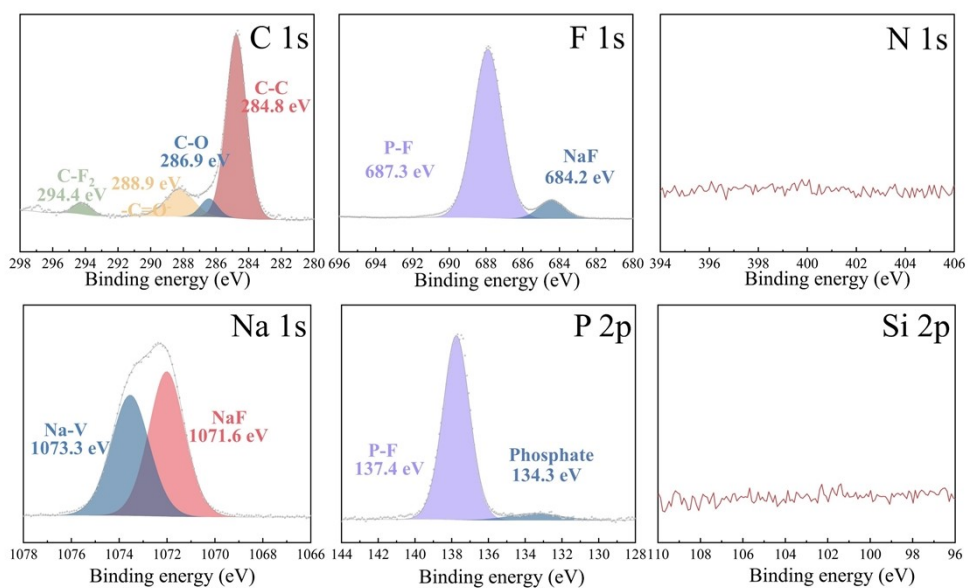

**Fig. S14** XPS characterization of the NVP cathode with TEP-F electrolyte.

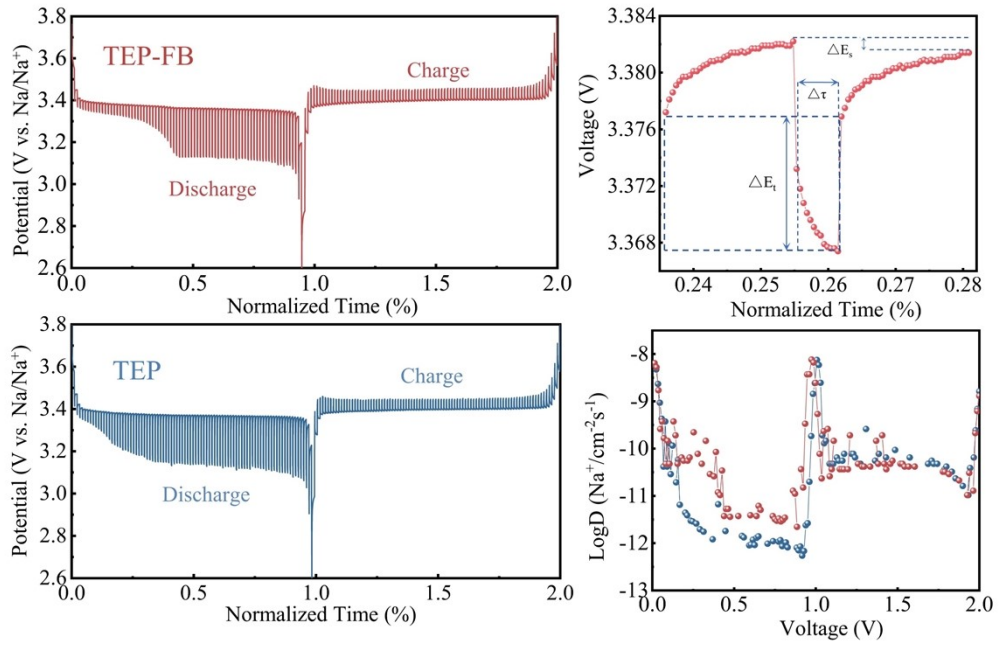

**Fig. S15** GITT testing of TEP-F and TEP-FB electrolytes.

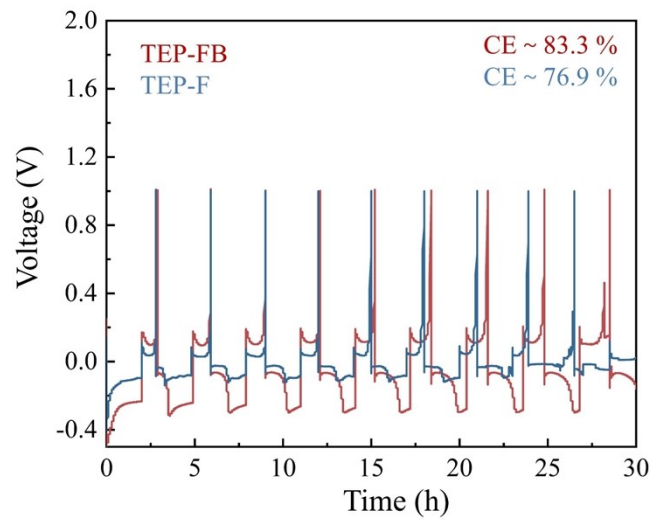

**Fig. S16** Coulombic efficiency of Cu/Na cells with TEP-FB and TEP.

## References

1. T. Wei, G. Yang and C. Wang, *Nano Energy*, 2017, **39**, 363-370.
